# Supplementary material for: On-chip characterization of cryoprotective agent mixtures using an EWOD-based digital microfluidic device
Source: Royal Society of Chemistry journal article supplement (doi:10.1039/c1lc20111e), 2011-01-01
Supplement: c1lc20111e.pdf [file c1lc20111e.pdf]

Supplementary Material (ESI) for Lab on a Chip  
This journal is © The Royal Society of Chemistry 2011

**Electronic supplementary information for**

**On-chip characterization of cryoprotective agent mixtures using an  
EWOD-based digital microfluidic device**

Sinwook Park<sup>1</sup>, Pavithra A. L. Wijethunga<sup>2</sup>, Hyejin Moon<sup>2</sup>, Bumsoo Han<sup>1,3\*</sup>

<sup>1</sup>School of Mechanical Engineering, Purdue University

<sup>2</sup>Department of Mechanical and Aerospace Engineering, University of Texas at Arlington

<sup>3</sup>Weldon School of Biomedical Engineering, Purdue University

585 Purdue Mall, West Lafayette, IN 47906, USA, E-mail: bumsoo@purdue.edu

**Setup for mapping phase change behavior of CPA mixtures**

Fig. S1 shows the experimental setup for mapping phase change behaviors of the mixtures. The EWOD platform, where an array of DMSO-PBS mixtures had been generated, was placed on a temperature-controlled microscope stage (MDBCS 196, Linkam). During the process, the DMSO-PBS mixture droplets were imaged using a microscope (MVX 10, Olympus) equipped with a CCD camera (PIXIS, Princeton Instruments). The recorded time-lapse images were further analyzed to determine the phase change temperatures during freezing and thawing.

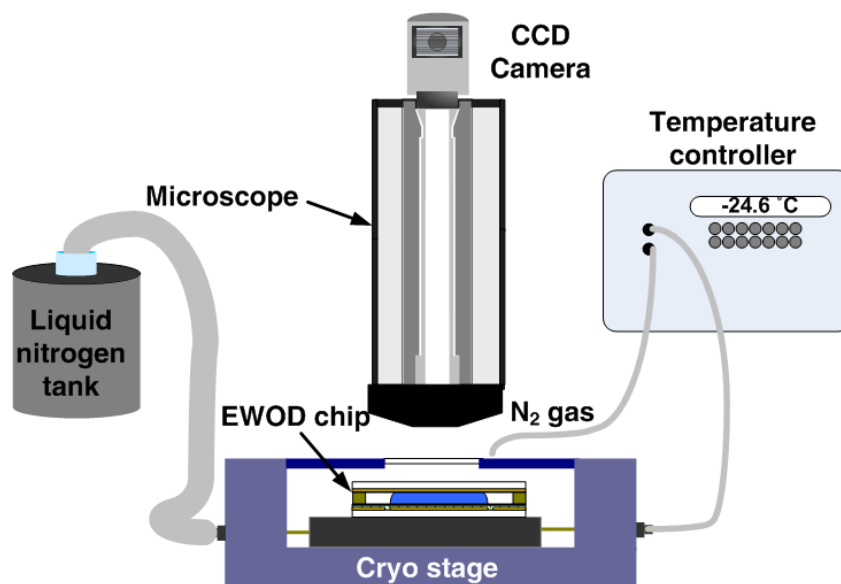

**Fig. S1** Experimental setup for mapping phase change behavior of CPA mixtures on the EWOD platform

### Differential scanning calorimeter (DSC) experiments

To compare the phase change temperatures of DMSO-PBS mixtures using EWOD, Differential scanning calorimeter, DSC (Q200, TA instruments) experiments were conducted with 8~9 mg of each sample in a standard aluminum sample pan. The sample was cooled to -120 °C at 10 °C/min and hold for 10 min. After cooling, the sample was warmed up to -30 °C at 10°C/min and additionally warmed at a slower warming rate (1 °C/min) which more closely approximates thermodynamic equilibrium.

Fig. S2 shows the obtained DSC thermograms of DMSO-PBS mixtures during freezing and thawing. The exothermic peak which represents heat release of ice crystal growth during are observed at 1X PBS, 12.5% and 25% DMSO-PBS mixture. The peak of supercooled eutectic crystallization is observed at 1x PBS only and there is no peak at 50% DMSO-PBS during cooling. During warming, the endothermic peak representing ice melting is observed at 1X PBS,

12.5% and 25% DMSO-PBS mixture, and the peak representing eutectic melting is observed at 1X PBS. Also there is no observed peak at 50% DMSO-PBS mixture.

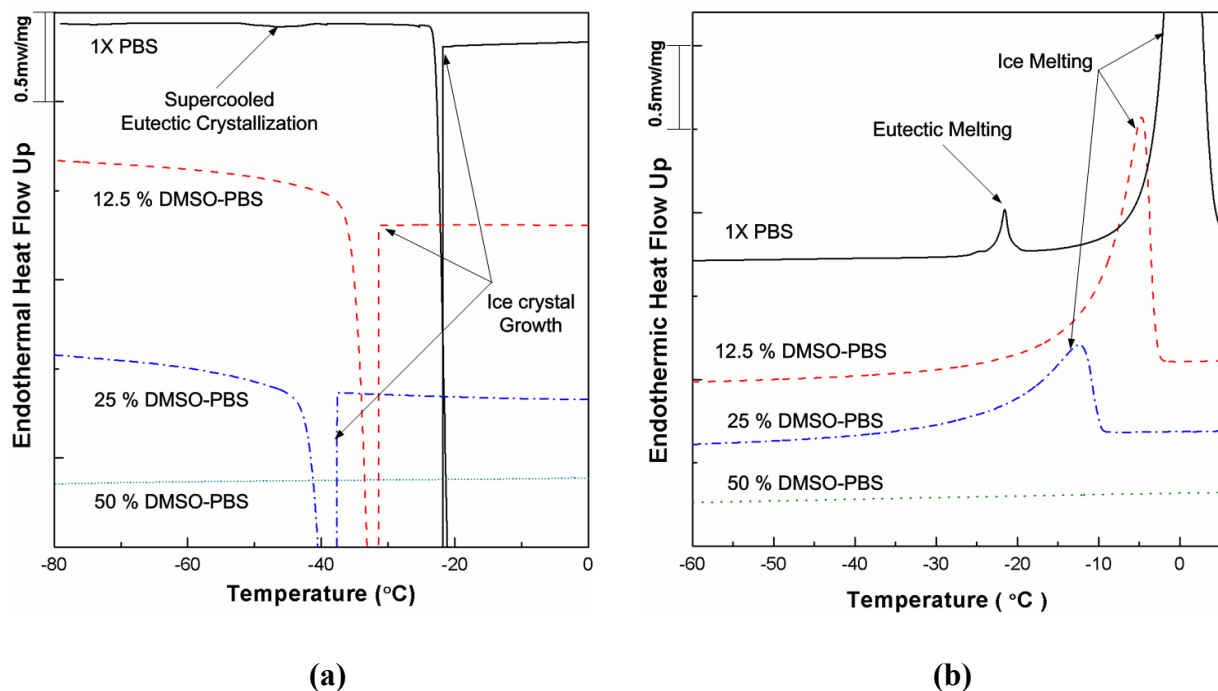

**Fig. S2** DSC thermograms of DMSO-PBS mixtures (a) during freezing and (b) during thawing.

## Reference

1. Y. J. Chang, K. Mohseni and V. M. Bright, *Sensors and Actuators A*, 2007, 136, 546-553.
